# Supplementary material
Source: PubMed Central journal article supplement (PMC3682339)
Supplement: supp_blood-2012-12-475558_blood-2012-12-475558-1.pdf [file supp_blood-2012-12-475558_blood-2012-12-475558-1.pdf]

Supplemental Table 1 - Point estimates of overall survival and relative survival for patients diagnosed with BL in the two periods of interest.

|           |             | Survival  |           |           |           | Relative Survival |           |           |           |           |
|-----------|-------------|-----------|-----------|-----------|-----------|-------------------|-----------|-----------|-----------|-----------|
|           |             | 1973-2001 |           | 2002-2008 |           | 1973-2001         |           | 2002-2008 |           |           |
|           |             | Estimate  | 95% CI    | Estimate  | 95% CI    | Estimate          | 95% CI    | Estimate  | 95% CI    |           |
| All       | 1 year      | 0.52      | 0.50-0.54 | 0.62      | 0.60-0.64 | 0.52              | 0.50-0.55 | 0.62      | 0.60-0.65 |           |
|           | 2 years     | 0.45      | 0.43-0.48 | 0.58      | 0.55-0.60 | 0.46              | 0.44-0.48 | 0.59      | 0.56-0.61 |           |
|           | 5 years     | 0.41      | 0.39-0.44 | 0.54      | 0.51-0.56 | 0.43              | 0.40-0.45 | 0.56      | 0.53-0.58 |           |
| Gender    | Female      | 1 year    | 0.52      | 0.47-0.57 | 0.60      | 0.55-0.64         | 0.53      | 0.48-0.58 | 0.61      | 0.56-0.65 |
|           |             | 2 years   | 0.43      | 0.38-0.48 | 0.55      | 0.50-0.59         | 0.44      | 0.39-0.48 | 0.56      | 0.51-0.61 |
|           |             | 5 years   | 0.39      | 0.34-0.44 | 0.49      | 0.44-0.54         | 0.40      | 0.35-0.45 | 0.51      | 0.45-0.56 |
|           | Male        | 1 year    | 0.51      | 0.48-0.53 | 0.62      | 0.60-0.65         | 0.52      | 0.49-0.55 | 0.63      | 0.61-0.66 |
|           |             | 2 years   | 0.46      | 0.44-0.49 | 0.59      | 0.56-0.62         | 0.47      | 0.44-0.50 | 0.60      | 0.57-0.62 |
|           |             | 5 years   | 0.42      | 0.40-0.45 | 0.56      | 0.53-0.59         | 0.44      | 0.41-0.46 | 0.57      | 0.54-0.60 |
| Age Group | 0-19 years  | 1 year    | 0.75      | 0.71-0.78 | 0.89      | 0.86-0.92         | 0.75      | 0.71-0.79 | 0.89      | 0.86-0.92 |
|           |             | 2 years   | 0.73      | 0.69-0.76 | 0.87      | 0.84-0.90         | 0.73      | 0.69-0.76 | 0.87      | 0.84-0.90 |
|           |             | 5 years   | 0.71      | 0.68-0.75 | 0.87      | 0.84-0.90         | 0.71      | 0.68-0.75 | 0.87      | 0.84-0.90 |
|           | 20-39 years | 1 year    | 0.44      | 0.40-0.49 | 0.68      | 0.63-0.72         | 0.44      | 0.41-0.50 | 0.68      | 0.63-0.73 |
|           |             | 2 years   | 0.38      | 0.34-0.43 | 0.63      | 0.58-0.68         | 0.38      | 0.34-0.43 | 0.63      | 0.58-0.68 |
|           |             | 5 years   | 0.34      | 0.30-0.39 | 0.60      | 0.55-0.66         | 0.35      | 0.31-0.39 | 0.60      | 0.55-0.66 |
|           | 40-59 years | 1 year    | 0.40      | 0.36-0.45 | 0.56      | 0.52-0.60         | 0.41      | 0.37-0.47 | 0.57      | 0.53-0.61 |
|           |             | 2 years   | 0.33      | 0.29-0.38 | 0.51      | 0.47-0.55         | 0.34      | 0.29-0.38 | 0.52      | 0.47-0.56 |
|           |             | 5 years   | 0.27      | 0.23-0.32 | 0.47      | 0.42-0.52         | 0.28      | 0.24-0.33 | 0.48      | 0.43-0.53 |
|           | 60+ years   | 1 year    | 0.34      | 0.29-0.40 | 0.38      | 0.34-0.43         | 0.36      | 0.31-0.42 | 0.40      | 0.36-0.45 |
|           |             | 2 years   | 0.27      | 0.22-0.32 | 0.35      | 0.30-0.40         | 0.29      | 0.24-0.34 | 0.37      | 0.32-0.42 |
|           |             | 5 years   | 0.20      | 0.16-0.25 | 0.27      | 0.22-0.33         | 0.25      | 0.19-0.30 | 0.33      | 0.27-0.39 |

|        |              |         |         |               |               |               |               |               |               |               |               |
|--------|--------------|---------|---------|---------------|---------------|---------------|---------------|---------------|---------------|---------------|---------------|
| Stage  | Limited      | 1 year  | 0.78    | 0.73-<br>0.83 | 0.77          | 0.74-<br>0.81 | 0.79          | 0.74-<br>0.84 | 0.78          | 0.75-<br>0.82 |               |
|        |              | 2 years | 0.73    | 0.68-<br>0.79 | 0.74          | 0.71-<br>0.78 | 0.74          | 0.68-<br>0.80 | 0.76          | 0.72-<br>0.79 |               |
|        |              | 5 years | 0.67    | 0.61-<br>0.73 | 0.69          | 0.64-<br>0.73 | 0.71          | 0.64-<br>0.76 | 0.71          | 0.66-<br>0.76 |               |
|        | Advanc<br>ed | 1 year  | 0.46    | 0.42-<br>0.51 | 0.53          | 0.50-<br>0.56 | 0.46          | 0.42-<br>0.51 | 0.53          | 0.50-<br>0.56 |               |
|        |              | 2 years | 0.40    | 0.36-<br>0.45 | 0.49          | 0.46-<br>0.52 | 0.41          | 0.36-<br>0.46 | 0.50          | 0.47-<br>0.53 |               |
|        |              | 5 years | 0.37    | 0.33-<br>0.42 | 0.45          | 0.42-<br>0.49 | 0.38          | 0.34-<br>0.43 | 0.46          | 0.43-<br>0.51 |               |
|        | Race         | Black   | 1 year  | 0.48          | 0.40-<br>0.57 | 0.51          | 0.44-<br>0.60 | 0.49          | 0.40-<br>0.57 | 0.51          | 0.44-<br>0.60 |
|        |              |         | 2 years | 0.41          | 0.33-<br>0.50 | 0.49          | 0.41-<br>0.57 | 0.42          | 0.34-<br>0.50 | 0.49          | 0.41-<br>0.57 |
|        |              |         | 5 years | 0.32          | 0.25-<br>0.41 | 0.47          | 0.39-<br>0.56 | 0.35          | 0.26-<br>0.43 | 0.47          | 0.39-<br>0.56 |
| Other* |              | 1 year  | 0.56    | 0.48-<br>0.65 | 0.62          | 0.54-<br>0.70 | 0.58          | 0.49-<br>0.66 | 0.62          | 0.54-<br>0.70 |               |
|        |              | 2 years | 0.52    | 0.44-<br>0.61 | 0.59          | 0.51-<br>0.67 | 0.53          | 0.44-<br>0.61 | 0.60          | 0.52-<br>0.68 |               |
|        |              | 5 years | 0.47    | 0.39-<br>0.56 | 0.53          | 0.45-<br>0.63 | 0.48          | 0.39-<br>0.56 | 0.55          | 0.46-<br>0.64 |               |
| White  |              | 1 year  | 0.51    | 0.48-<br>0.53 | 0.63          | 0.60-<br>0.65 | 0.52          | 0.50-<br>0.55 | 0.64          | 0.61-<br>0.66 |               |
|        |              | 2 years | 0.45    | 0.43-<br>0.48 | 0.59          | 0.56-<br>0.61 | 0.46          | 0.43-<br>0.48 | 0.60          | 0.57-<br>0.62 |               |
|        |              | 5 years | 0.42    | 0.39-<br>0.44 | 0.55          | 0.52-<br>0.58 | 0.43          | 0.40-<br>0.46 | 0.57          | 0.54-<br>0.60 |               |

\*American Indian/Alaska Native, Asian or Pacific Islander and other unspecified.
